# Supplementary material
Source: Springer Nature journal article supplement (https://www.springermedizin.de/resource/supplementary/12879_2011_1886_MOESM1_ESM.pdf/9443922)

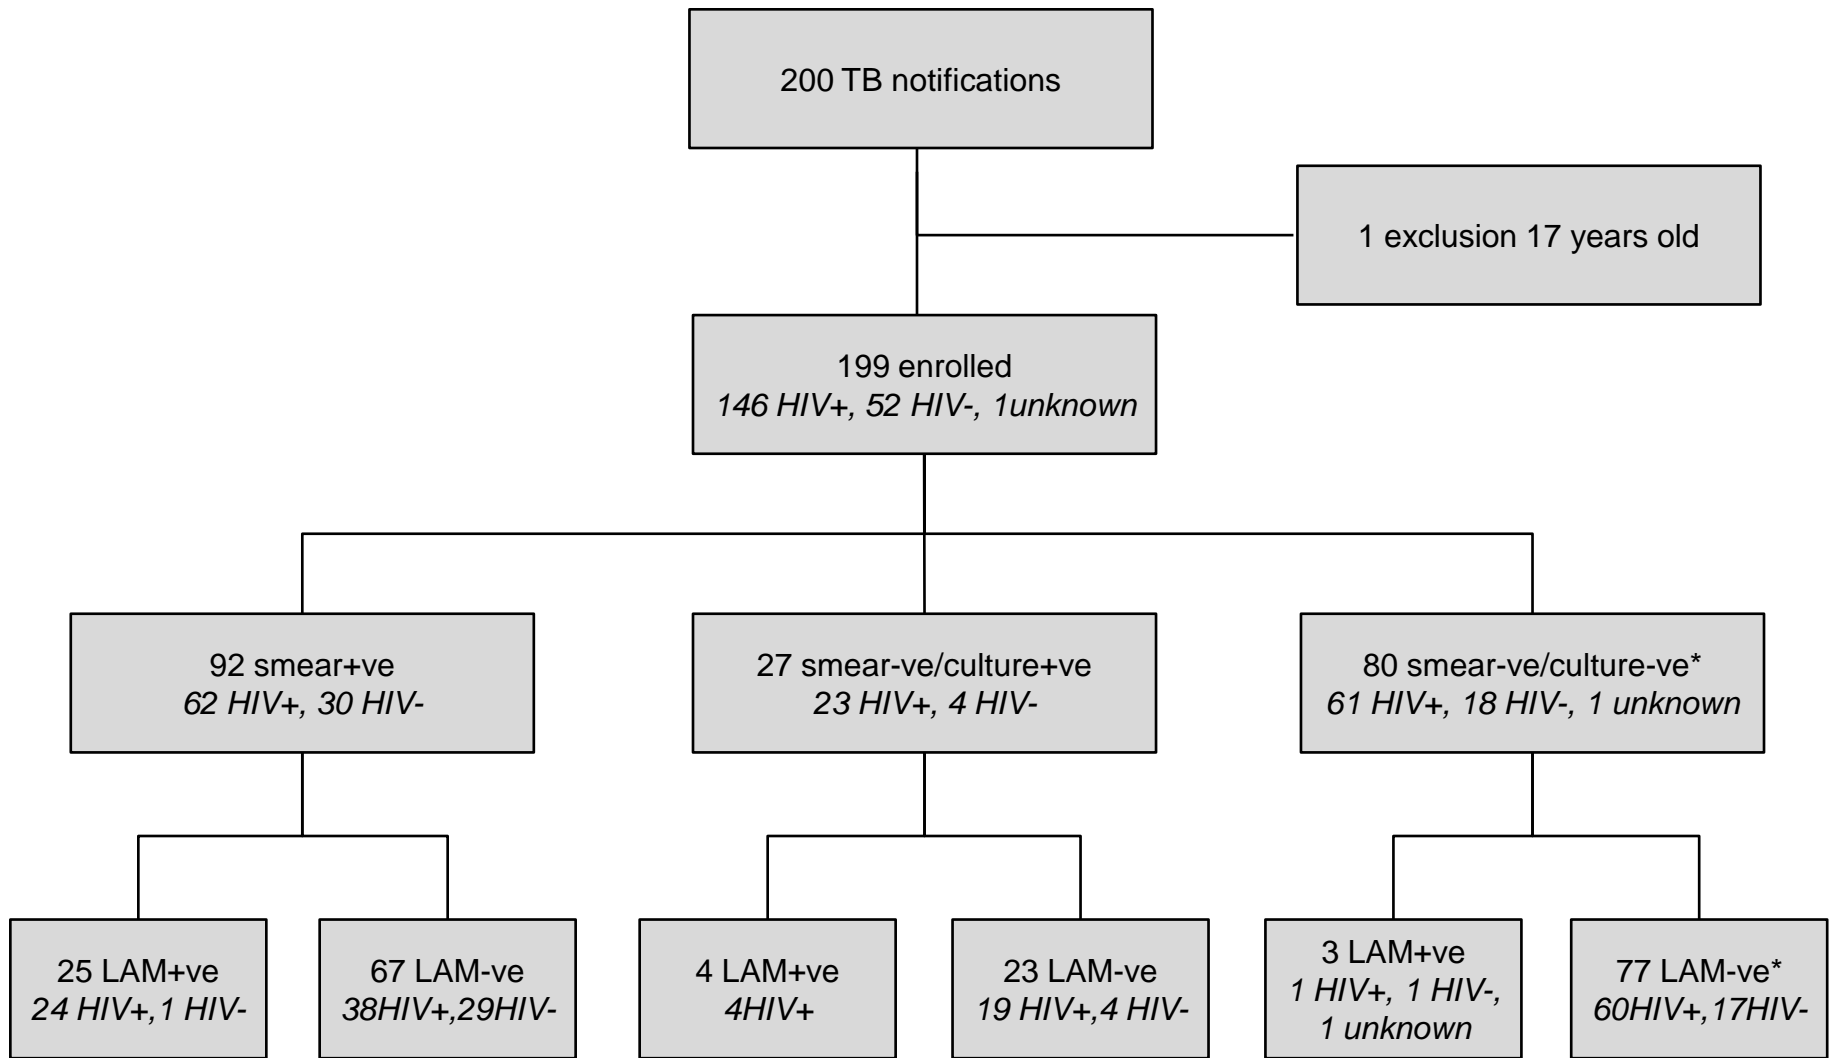

\*1 subject did not provide a sputum sample

Supplement: MOESM1 [file 9443922]
